# Supplementary material for: Effects of Social Distancing on Diabetes Management in Older Adults during COVID-19 Pandemic
Source: PubMed Central journal article supplement — Diabetes Metab J. 2021 Aug 30;45(5):765–72. doi: 10.4093/dmj.2021.0096 (PMC8497936; doi:10.4093/dmj.2021.0096), 2021-08-30
Supplement: dmj-2021-0096-suppl1.pdf [file dmj-2021-0096-suppl1.pdf]

**Supplementary Table 1.** Change in physical activity level from pre-SD to SD era according to age group

| Physical activity level (MET)  | Pre-SD era         |                     |                    |                | SD era             |                     |                    |                |
|--------------------------------|--------------------|---------------------|--------------------|----------------|--------------------|---------------------|--------------------|----------------|
|                                | 60–69 yr<br>(n=61) | 70–79 yr<br>(n=137) | 80–89 yr<br>(n=46) | <i>P</i> value | 60–69 yr<br>(n=61) | 70–79 yr<br>(n=138) | 80–89 yr<br>(n=46) | <i>P</i> value |
| High activity ( $\geq 3,000$ ) | 28 (45.9)          | 25 (18.1)           | 9 (20.0)           | 0.002          | 18 (29.5)          | 17 (12.3)           | 7 (15.2)           | 0.091          |
| Moderate activity (600–2,999)  | 28 (45.9)          | 93 (67.4)           | 29 (62.2)          |                | 31 (50.8)          | 83 (60.1)           | 27 (58.7)          |                |
| Low activity (<600)            | 5 (8.2)            | 19 (13.8)           | 8 (17.4)           |                | 12 (19.7)          | 38 (27.5)           | 12 (26.1)          |                |

Values are presented as number (%).

SD, social distancing; MET, metabolic equivalent task (expressed as MET/min/week<sup>-1</sup>).
