# Supplementary material for: Effects of Social Distancing on Diabetes Management in Older Adults during COVID-19 Pandemic
Source: PubMed Central journal article supplement — Diabetes Metab J. 2021 Aug 30;45(5):765–72. doi: 10.4093/dmj.2021.0096 (PMC8497936; doi:10.4093/dmj.2021.0096), 2021-08-30
Supplement: dmj-2021-0096-suppl2.pdf [file dmj-2021-0096-suppl2.pdf]

**Supplementary Table 2.** Changes in nutritional status from the pre-SD to SD era

|                                | Pre-SD era | SD era     | <i>P</i> value |
|--------------------------------|------------|------------|----------------|
| MNA score                      | 21.0±2.0   | 21.8±2.1   | <0.001         |
| Malnutrition (<15)             | 4 (1.6)    | 2 (0.8)    | 0.500          |
| Risk of malnutrition (15–21.5) | 135 (54.9) | 88 (35.8)  | <0.001         |
| No malnutrition (≥22)          | 95 (38.6)  | 144 (58.5) | <0.001         |

Values are presented as mean ± standard deviation or number (%).  
SD, social distancing; MNA, Mini Nutritional Assessment.
