# Supplementary material for: Effects of Social Distancing on Diabetes Management in Older Adults during COVID-19 Pandemic
Source: PubMed Central journal article supplement — Diabetes Metab J. 2021 Aug 30;45(5):765–72. doi: 10.4093/dmj.2021.0096 (PMC8497936; doi:10.4093/dmj.2021.0096), 2021-08-30
Supplement: dmj-2021-0096-suppl3.pdf [file dmj-2021-0096-suppl3.pdf]

**Supplementary Table 3.** Demographic, metabolic, and psychological variables according to the changes in total physical activity level

| Variable                      | Change in physical activity from the pre-SD to SD era |                  | P value |
|-------------------------------|-------------------------------------------------------|------------------|---------|
|                               | No decrease (n=130)                                   | Decrease (n=104) |         |
| Male sex                      | 60 (46.2)                                             | 35 (33.7)        | 0.053   |
| Age, yr                       | 74.36±5.7                                             | 73.09±5.9        | 0.095   |
| Weight change, kg             | 0.27±2.2                                              | 0.96±1.9         | 0.013   |
| Fasting glucose change, mg/dL | 2.99±30.9                                             | 15.6±29.7        | 0.002   |
| HbA1c change, %               | 0.16±0.8                                              | 0.6±1.0          | <0.001  |
| <b>Stress</b>                 |                                                       |                  |         |
| IES-R score                   | 5.80±7.0                                              | 7.12±6.1         | 0.135   |
| IES-R score >24               | 5 (3.9)                                               | 2 (2.0)          | 0.401   |
| <b>Depression</b>             |                                                       |                  |         |
|                               | No decrease (n=130)                                   | Decrease (n=103) |         |
| PHQ-9 score                   | 3.2±4.0                                               | 2.9±3.1          | 0.496   |
| PHQ-9 ≥10                     | 6 (4.6)                                               | 4 (3.9)          | 0.271   |
| <b>Sarcopenia</b>             |                                                       |                  |         |
|                               | No decrease (n=128)                                   | Decrease (n=103) |         |
| SARC-F ≥4                     | 9 (7.0)                                               | 3 (2.9)          | 0.204   |
| SARC-Calf ≥11                 | 19 (14.8)                                             | 13 (12.6)        | 0.969   |

Values are presented as number (%) or mean ± standard deviation.

SD, social distancing; HbA1c, glycated hemoglobin; IES-R, Impact of Event Scale-Revised; PHQ-9, Patient Health Questionnaire-9; SARC-F, screening questionnaire for sarcopenia; SARC-Calf, SARC-F+calf circumference.
