# Supplementary material for: Effects of Social Distancing on Diabetes Management in Older Adults during COVID-19 Pandemic
Source: PubMed Central journal article supplement — Diabetes Metab J. 2021 Aug 30;45(5):765–72. doi: 10.4093/dmj.2021.0096 (PMC8497936; doi:10.4093/dmj.2021.0096), 2021-08-30
Supplement: dmj-2021-0096-suppl4.pdf [file dmj-2021-0096-suppl4.pdf]

**Supplementary Table 4.** Participants' explanations of the reason for an increase in HbA1c level >2.0%

| Patient no. | 2020  |          | 2019  |          | HbA1c change, % | History                                                                                                             |
|-------------|-------|----------|-------|----------|-----------------|---------------------------------------------------------------------------------------------------------------------|
|             | Month | HbA1c, % | Month | HbA1c, % |                 |                                                                                                                     |
| S0202       | May   | 12.1     | May   | 8.6      | 3.5             | Increased fruit intake (watermelon, Korean melon); quit swimming                                                    |
| S0061       | May   | 9.7      | July  | 6.6      | 3.1             | Increased rice cake intake between meals                                                                            |
| S0227       | June  | 11.1     | May   | 8.3      | 2.8             | Irregular diet                                                                                                      |
| S0063       | May   | 7.9      | May   | 5.3      | 2.6             | Out-of-control eating; decreased exercise because of leg pain                                                       |
| S0184       | May   | 10.3     | May   | 7.9      | 2.4             | Increased snack intake                                                                                              |
| S0189       | May   | 9.3      | June  | 7.0      | 2.3             | Stopped regular exercise                                                                                            |
| S0008       | May   | 11.3     | April | 9.2      | 2.1             | Increased intake of soy milk and ramen; increased frequency of eating out; skipped insulin injection intermittently |
| S0140       | May   | 7.8      | May   | 5.8      | 2.0             | Decreased physical activity                                                                                         |

HbA1c, glycated hemoglobin.
